# Supplementary material for: Enantiospecific recognition of 2-butanol by an inherently chiral cavitand in the solid state
Source: Royal Society of Chemistry journal article supplement (doi:10.1039/c7ce00557a), 2017-01-01
Supplement: c7ce00557a1.pdf [file c7ce00557a1.pdf]

## Enantiospecific recognition of 2-butanol by an inherently chiral cavitand in the solid state

G. Brancatelli,<sup>a</sup> C. Nicosia,<sup>b</sup> T. Barboza,<sup>b</sup> L. Guy,<sup>c</sup> J.-P. Dutasta,<sup>c</sup> R. De Zorzi,<sup>a</sup> N. Demitri,<sup>a</sup> E. Dalcanale,<sup>b</sup> S. Geremia<sup>a\*</sup> and R. Pinalli<sup>b\*</sup>

- a. CEB Centre of Excellence in Biocrystallography, Department of Chemical and Pharmaceutical Sciences, University of Trieste, Via L. Giorgieri 1, 34127, Trieste, Italy
- b. Dipartimento di Scienze Chimiche, della Vita e della Sostenibilità Ambientale, Università di Parma and INSTM UdR Parma, Parco Area delle Scienze 17/A, 43124 Parma (Italy).
- c. Laboratoire de Chimie, CNRS and École Normale Supérieure de Lyon, Lyon 07, France

### Electronic Supplementary Information

| No | Contents                                                                                                   | Page |
|----|------------------------------------------------------------------------------------------------------------|------|
| 1  | Characterization of achiral cavitand <b>5</b> through <sup>1</sup> H and <sup>31</sup> P NMR               | S2   |
| 2  | Figure S1: Achiral cavitand <b>5</b>                                                                       | S2   |
| 3  | Figure S2: <sup>1</sup> H NMR of achiral cavitand <b>5</b>                                                 | S2   |
| 4  | Figure S3: <sup>1</sup> H NMR of the chiral isomer cR/cS-cav                                               | S3   |
| 5  | Figure S4: Comparison between the <sup>31</sup> P NMR of the chiral isomer cR/cS-cav and cavitand <b>5</b> | S3   |
| 6  | Figure S5: Analytical HPLC chromatogram of the cR/cS cavitands chiral resolution                           | S4   |
| 7  | Figure S6: Chromatogram of the chiral resolution performed by semi-preparative HPLC.                       | S4   |
| 8  | Figure S7: Asymmetric unit content of the crystals of the racemic mixture of cavitands with 2-butanol.     | S5   |
| 9  | Figure S8: Top and side views of the diastereomeric complexes                                              | S5   |
|    | Table S1: Crystallographic data and refinement details for (±)-2-butanol@cS/cR-cav.                        | S6   |
|    | Figure S9: Chirality assignment for the R-2-butanol@cR-cav                                                 | S7   |
|    | Figure S10: Chirality assignment for the S-2-butanol@cS-cav                                                | S8   |
| 10 | Calculation with CSM (Continuous Symmetry Measures)                                                        | S9   |
| 11 | Table S2: Chirality values of different species mentioned in the paper                                     | S9   |

## Characterization of achiral cavitand **5**

$^1\text{H}$  NMR (300 MHz,  $\text{CDCl}_3$ ):  $\delta$  = 8.17 (m, 2H, P(S)ArH<sub>ortho</sub>); 8.08 (m, 4H, P(O)ArH<sub>ortho</sub>); 7.69-7.50 (m, 9H, P(X)ArH<sub>para</sub>, P(X)ArH<sub>meta</sub>, X=O,S); 7.28 (m, 4H, ArH<sub>down</sub>); 6.83 (s, 2H, ArH<sub>up</sub>); 6.81 (s, 2H, ArH<sub>up</sub>); 5.70 (d, 1H, CH<sub>2(out)</sub>, J=7.4 Hz); 4.92 (d, 1H, CH<sub>2(in)</sub>, J=7.4 Hz); 4.68 (m, 4H, ArCH); 2.37 (m, 8H, CH<sub>2</sub>CH<sub>3</sub>); 1.07 (m, 12H, CH<sub>2</sub>CH<sub>3</sub>);

$^{31}\text{P}$  NMR (162 MHz,  $\text{CDCl}_3$ ):  $\delta$  = 78.70 (s, 1P, P=S); 8.82 (s, 2P, P=O)

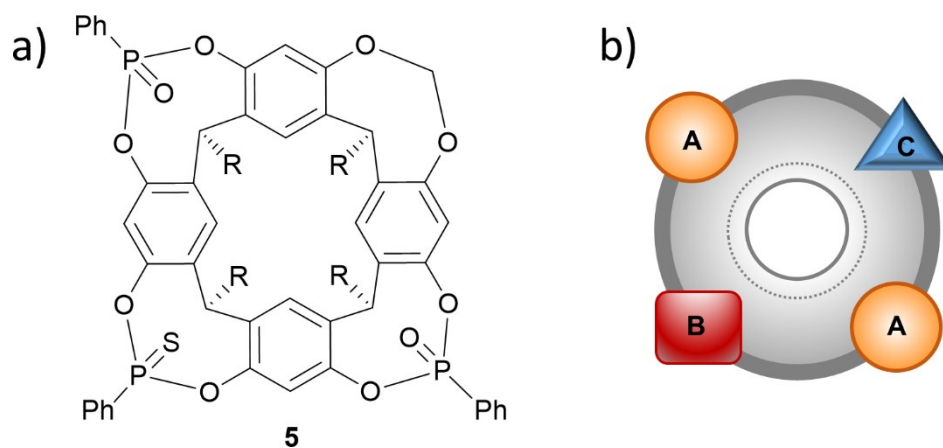

**Figure S1.** Achiral cavitand **5** (a) in a ABAC configuration (b).

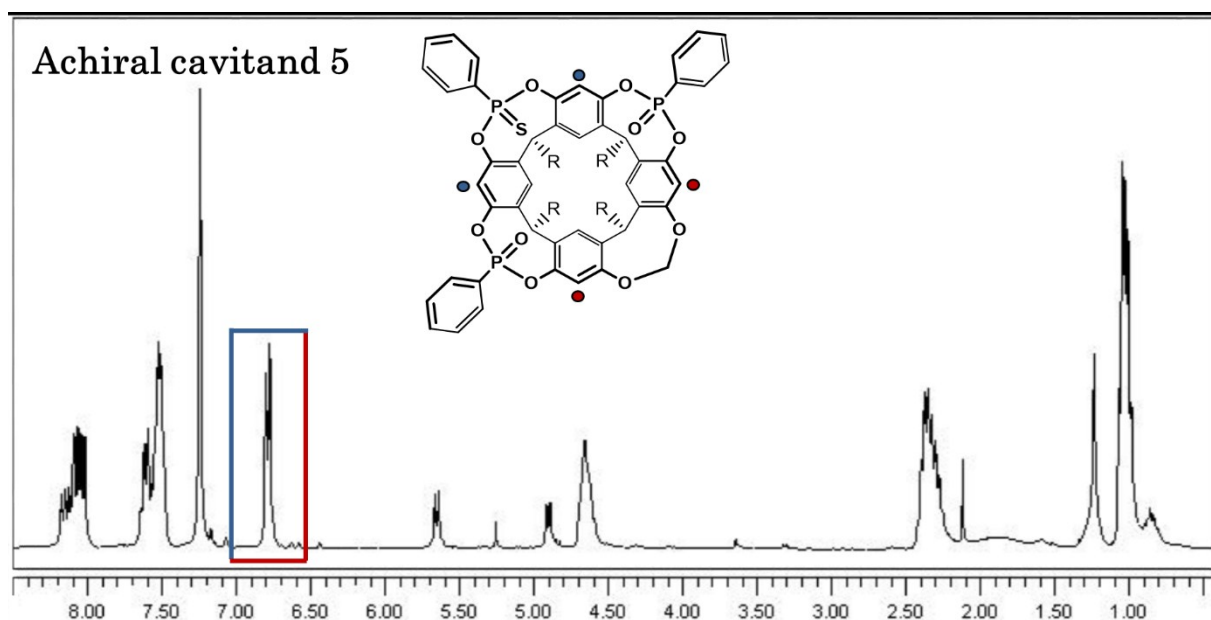

**Figure S2.**  $^1\text{H}$  NMR of the achiral cavitand **5**. The two signals corresponding to the apical protons are highlighted.

## Characterization of cR/cS-cav

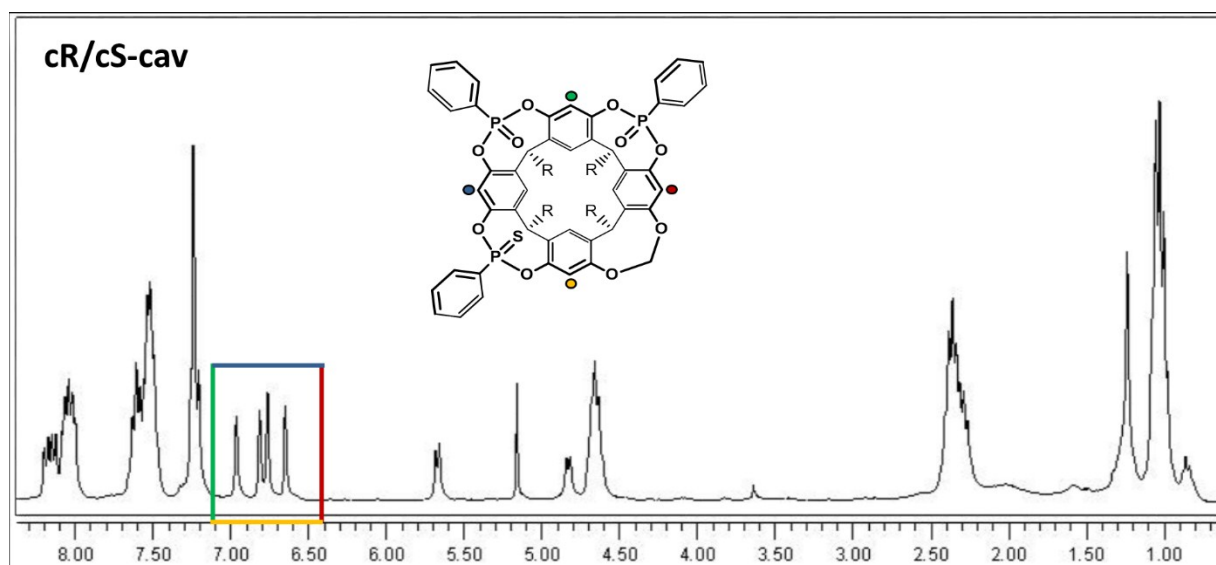

**Figure S3.**  $^1\text{H}$  NMR of the chiral isomer cR/cS-cav. The four different apical signals are highlighted.

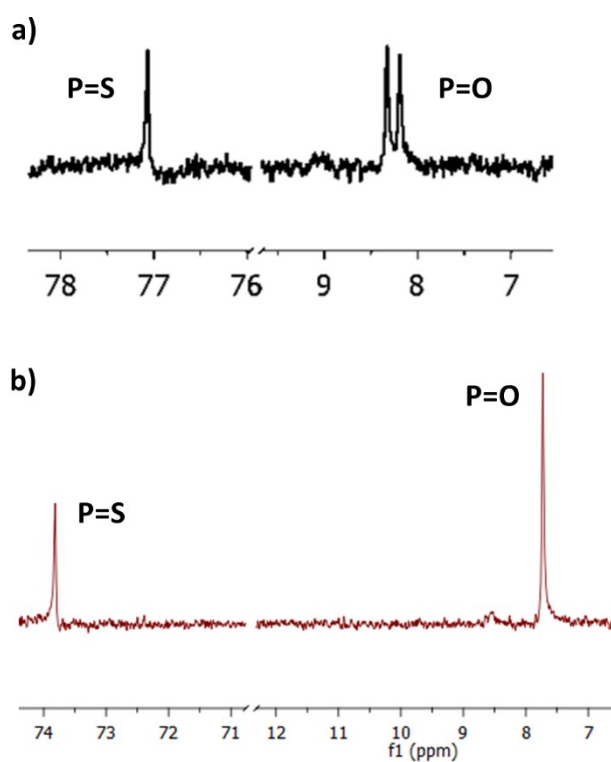

**Figure S4.** Comparison between the  $^{31}\text{P}$  NMR of the chiral isomer cR/cS-cav and cavitand **5**.

## Chiral HPLC chromatogram

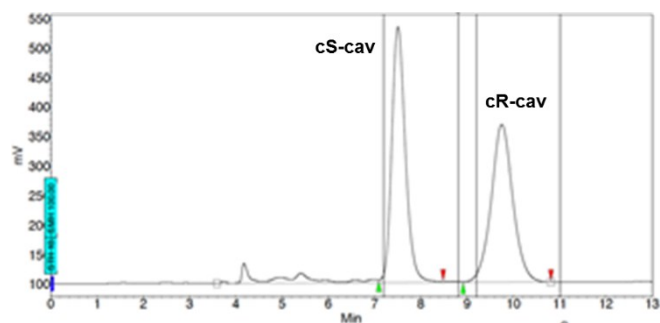

**Figure S5.** Analytical HPLC chromatogram of the cR/Cs cavitands chiral resolution.

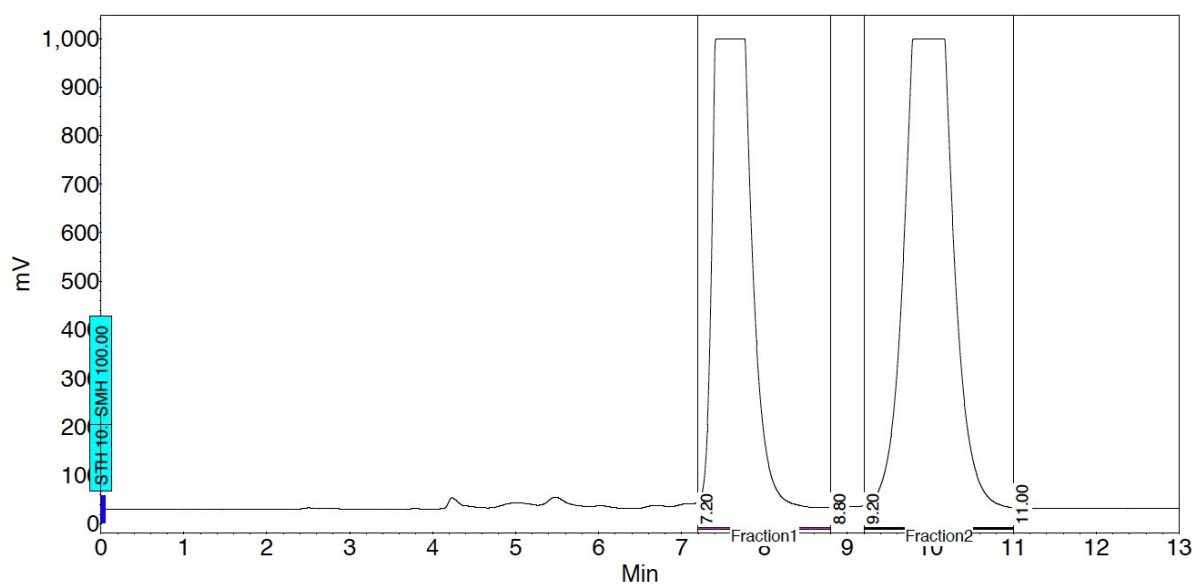

**Figure S6.** Chromatogram performed by semi-preparative HPLC on concentrated samples. Column: chiral pack IC (10x250mm). Eluent: CH<sub>3</sub>CN/H<sub>2</sub>O/Acetone 8/2/2. Flow rate 4.5 mL/min .

## Crystals structure of the complexes

In the picture below the structure of the racemic complexes of the cavitant with 2-butanol is shown.

In the asymmetric unit of the crystal two cavitant molecules with opposite configuration were identified, together with three 2-butanol molecules and two water molecules (Figure S7). In the cavity of each cavitant a 2-butanol guest alcohol molecule was located. The two enantiomeric cavitants were hosting the two enantiomers of the 2-butanol: the cavity of the *S*-cavitant was occupied by the 2-butanol molecule with *S* configuration, and similarly the cavity of the *R*-cavitant hosted the *R*-2-butanol, as observed in Figure S8. Conversely from what observed in the structure of the enantiopure *R*-cavitant with the *R*-2-butanol, in the structure of the racemic mixture the methyl group of the alcohol guest molecule is pointing towards the cavity.

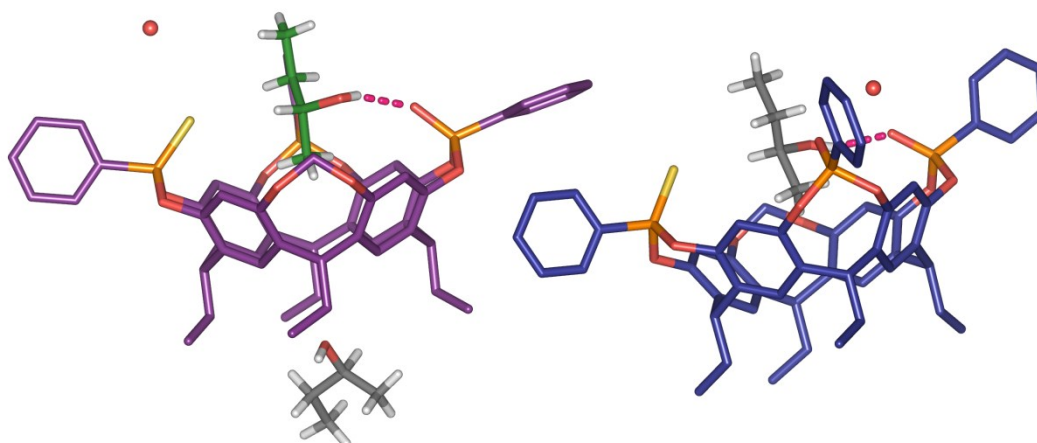

**Figure S7.** Asymmetric unit content of the crystals of the racemic mixture of cavitants with 2-butanol. Unit cell dimensions:  $P2_1/n$ ,  $a = 24.150(5)$ ,  $b = 15.847(3)$ ,  $c = 31.397(6)$  Å,  $\alpha = 90$ ,  $\beta = 96.99(3)$ ,  $\gamma = 90$ ,  $V = 11927(4)$ ,  $Z = 8$ ,  $\rho = 1.252$ ,  $R_1 = 0.1031$ ,  $wR_2 = 0.2556$ , total reflections 9333.

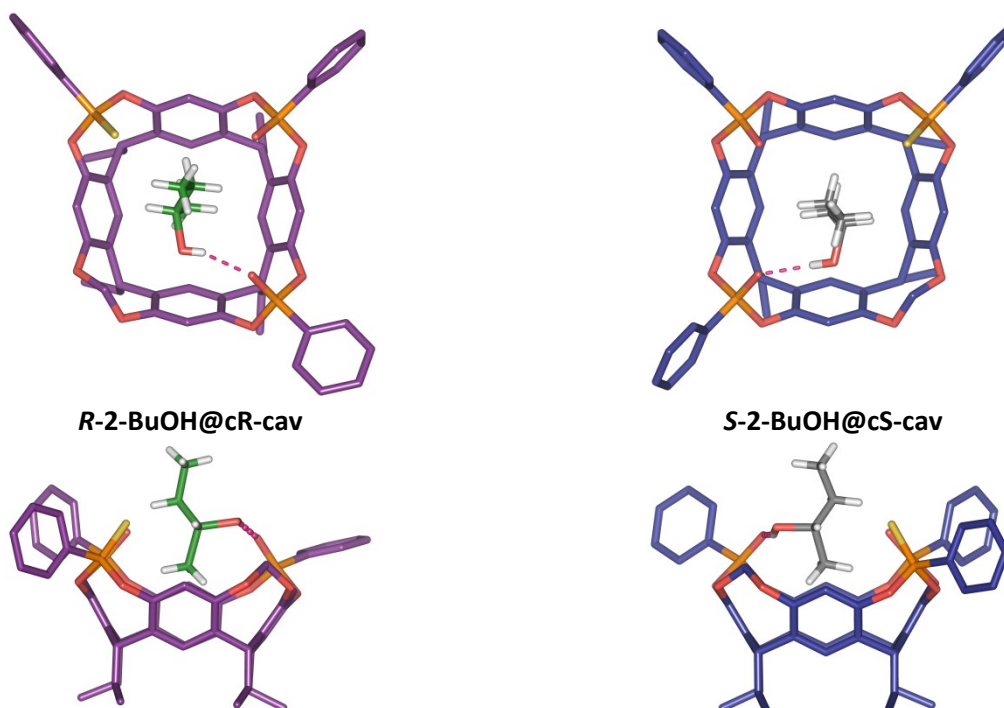

**Figure S8.** Top and side views of the diastereomeric complexes, obtained by co-crystallization of the racemic mixture of the cavitant in the presence of *R/S*-2-butanol.

**Table S1. Crystallographic data and refinement details for ( $\pm$ )-2-butanol@cS/cR-cav.**

| <b>(<math>\pm</math>)-2-butanol @ cS/cR-cav</b>                                      |                                                                                                                          |
|--------------------------------------------------------------------------------------|--------------------------------------------------------------------------------------------------------------------------|
| Empirical formula                                                                    | C <sub>55</sub> H <sub>49</sub> O <sub>10</sub> P <sub>3</sub> S, 2.7 C <sub>4</sub> H <sub>10</sub> O, H <sub>2</sub> O |
| Formula weight                                                                       | 1213.07                                                                                                                  |
| T (K)                                                                                | 100(2) K                                                                                                                 |
| $\lambda$ (Å)                                                                        | 1.542                                                                                                                    |
| Crystal system                                                                       | Monoclinic                                                                                                               |
| Space group                                                                          | <i>P</i> 2 <sub>1</sub> / <i>n</i>                                                                                       |
| Unit cell dimensions (Å, °)                                                          | <i>a</i> = 24.150(5)<br><i>b</i> = 15.847(3), $\beta$ = 96.99(3)<br><i>c</i> = 31.397(6)                                 |
| <i>V</i> (Å <sup>3</sup> )                                                           | 11927(4)                                                                                                                 |
| <i>Z</i>                                                                             | 8                                                                                                                        |
| $\rho_{\text{calc}}$ (g/cm <sup>3</sup> )                                            | 1.351                                                                                                                    |
| $\mu$ (mm <sup>-1</sup> )                                                            | 1.700                                                                                                                    |
| F(000)                                                                               | 5147.2                                                                                                                   |
| Crystal size (mm <sup>3</sup> )                                                      | 0.200 x 0.100 x 0.100                                                                                                    |
| $\theta$ range (°)                                                                   | 2.184 to 44.494                                                                                                          |
| Reflections collected                                                                | 23805                                                                                                                    |
| Independent reflections                                                              | 9333                                                                                                                     |
| Refinement method                                                                    | Full-matrix least-squares on F <sup>2</sup>                                                                              |
| Data/restraints/parameter<br><i>s</i>                                                | 9333 / 9 / 740                                                                                                           |
| Goof                                                                                 | 1.042                                                                                                                    |
| <i>R</i> <sub>1</sub> , <i>wR</i> <sub>2</sub> [ <i>I</i> > 2 $\sigma$ ( <i>I</i> )] | 0.1031, 0.2556                                                                                                           |
| <i>R</i> <sub>1</sub> , <i>wR</i> <sub>2</sub> (all data)                            | 0.1112, 0.2622                                                                                                           |

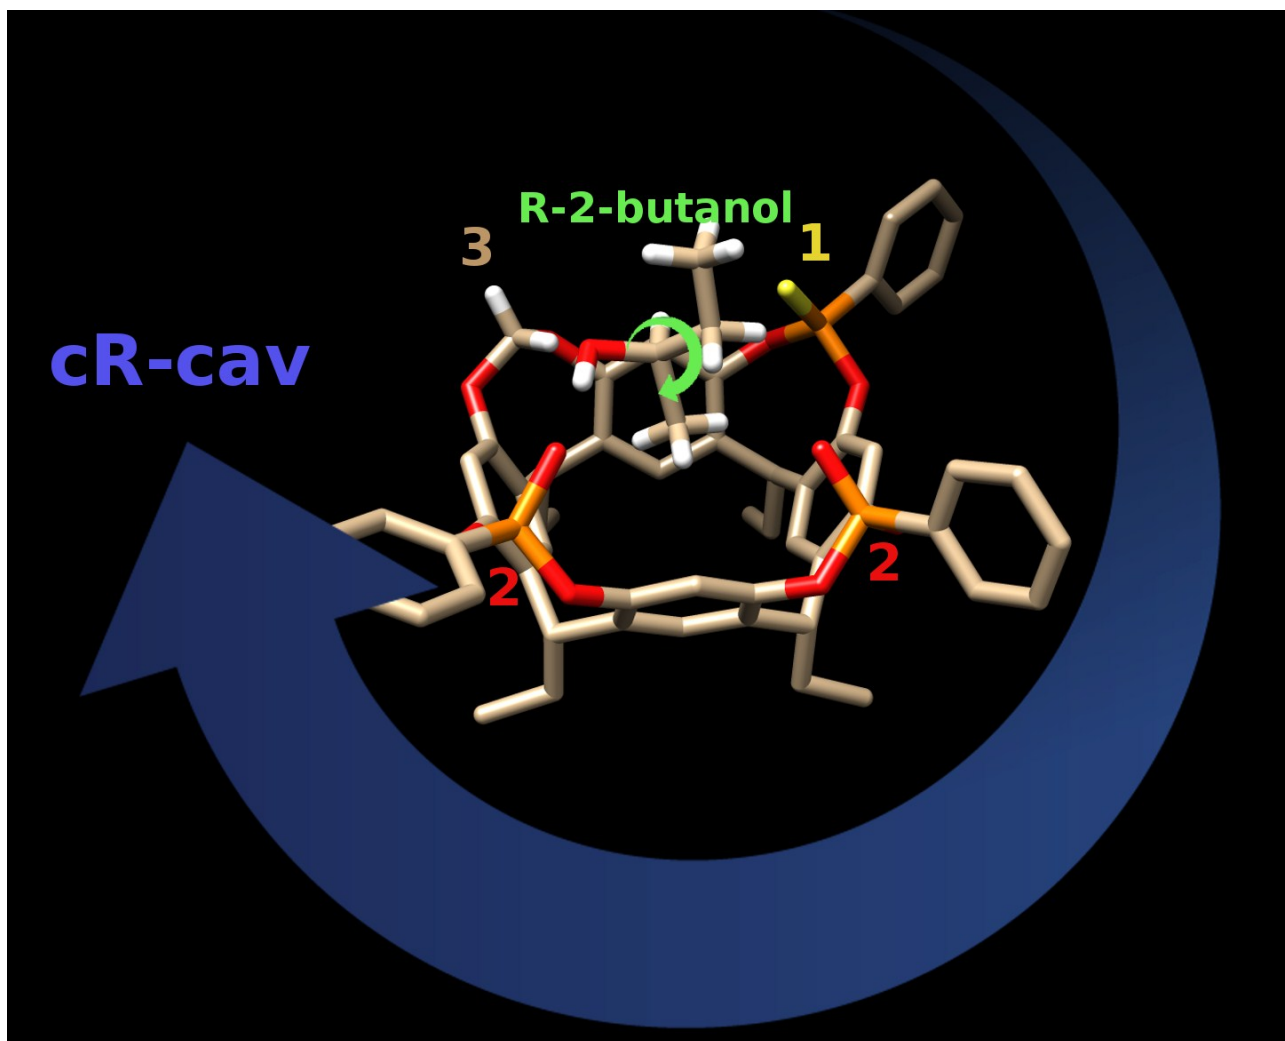

**Figure S9.** Chirality assignment for the R-2-butanol@cR-cav from the ( $\pm$ )-2-butanol@cS/cR-cav crystal structure, according to the rule summarized in Figure 2 in the main article.

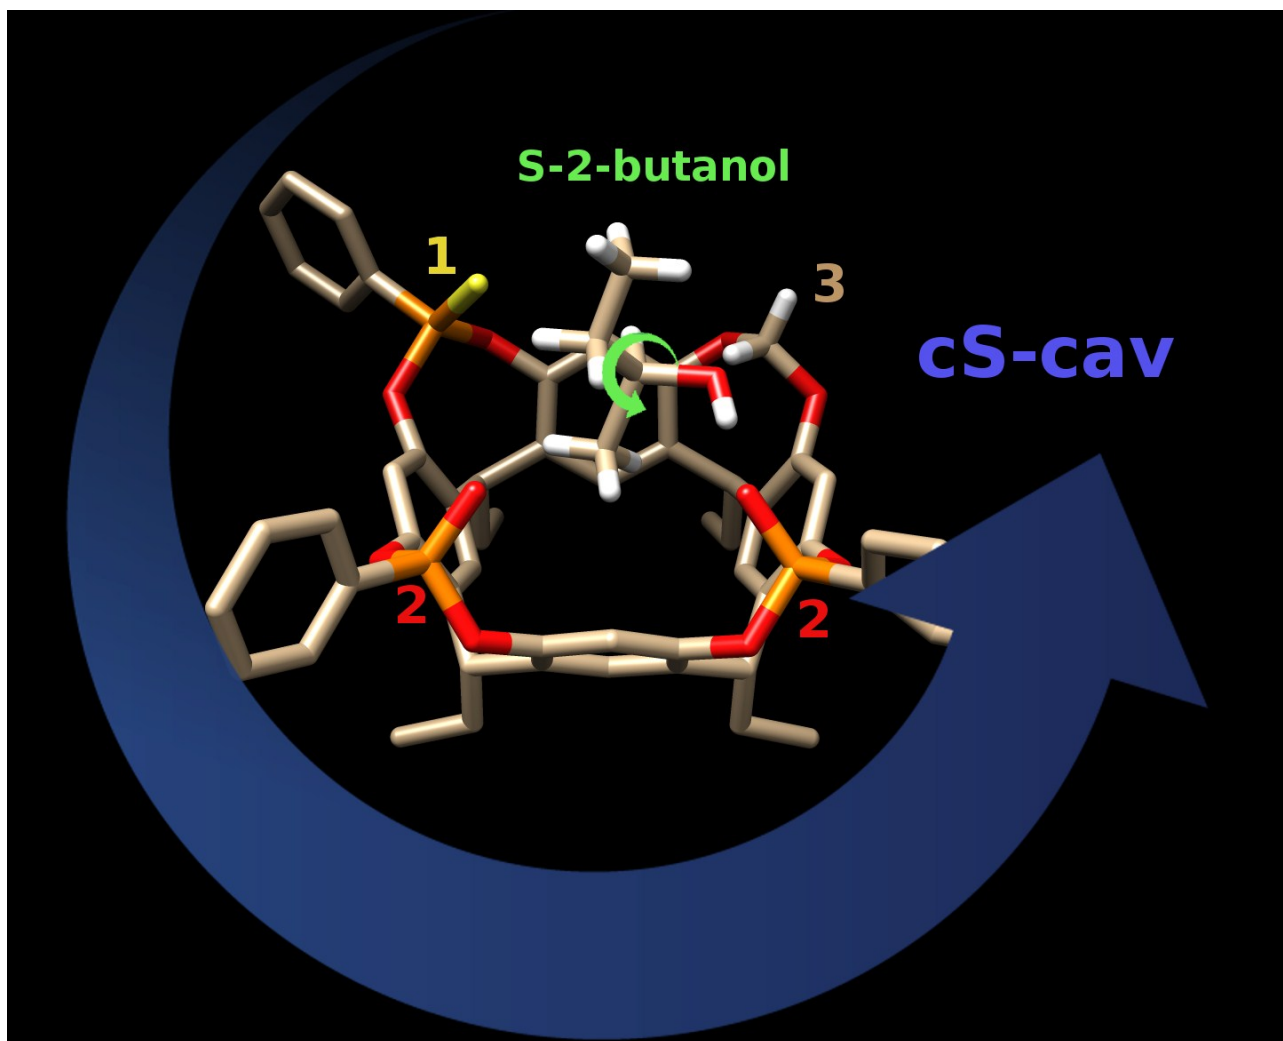

**Figure S10.** Chirality assignment for the S-2-butanol@cS-cav from the ( $\pm$ )-2-butanol@cS/cR-cav crystal structure, according to the rule summarized in Figure 2 in the main article.



### Calculation with CSM (Continuous Symmetry Measures)

The calculation of the chirality values was performed at the website: <http://chirality.ch.huji.ac.il/new/?cmd=chirality.25>

The calculation without hydrogens was used to estimate the chirality value for the cavitands cR-cav and Tiiii[H,CH<sub>3</sub>,CH<sub>3</sub>] and for the host-guest complex R-BuOH@cR-cav. In Table S2 the chirality values of hosts and guests mentioned in the paper are reported.

**Table S2: chirality values of different species mentioned in the paper.**

| <b>Chemical species</b>                    | <b>Chirality value</b> |
|--------------------------------------------|------------------------|
| alanine                                    | 10.7                   |
| 2-butanol                                  | 1.9                    |
| cR-cav                                     | 11.5                   |
| Tiiii[H,CH <sub>3</sub> ,CH <sub>3</sub> ] | 0.1                    |
| R-BuOH@cR-cav                              | 13.7                   |
